# Supplementary material for: The Metabolic Response of Various Cell Lines to Microtubule-Driven Uptake of Lipid- and Polymer-Coated Layer-by-Layer Microcarriers
Source: MDPI journal article supplement (doi:10.3390/pharmaceutics13091441), 2021-09-10
Supplement: s1 [file s1]

Supplementary Material

# The Metabolic Response of Various Cell Lines to Microtubule-Driven Uptake of Lipid- and Polymer-Coated Layer-by-Layer Microcarriers

Claudia Claus <sup>1,†,\*</sup>, Robert Fritz <sup>2,†</sup>, Erik Schilling <sup>3</sup> and Uta Reibetanz <sup>2,\*</sup>

<sup>1</sup> Institute of Medical Microbiology and Virology, Faculty of Medicine, University of Leipzig, Johannisallee 30, 04103 Leipzig, Germany

<sup>2</sup> Institute for Medical Physics and Biophysics, Faculty of Medicine, University of Leipzig, Härtelstrasse 16-18, 04107 Leipzig, Germany; fritz\_robert@gmx.net

<sup>3</sup> Institute of Clinical Immunology, Faculty of Medicine, University of Leipzig, Johannisallee 30, 04103 Leipzig, Germany; erik.schilling@medizin.uni-leipzig.de

\* Correspondence: claudia.claus@medizin.uni-leipzig.de (C.C.); uta.reibetanz@medizin.uni-leipzig.de (U.R.); Tel.: +49-341-9714321 (C.C.); +49-341-9715703 (U.R.)

† These authors contributed equally to this manuscript

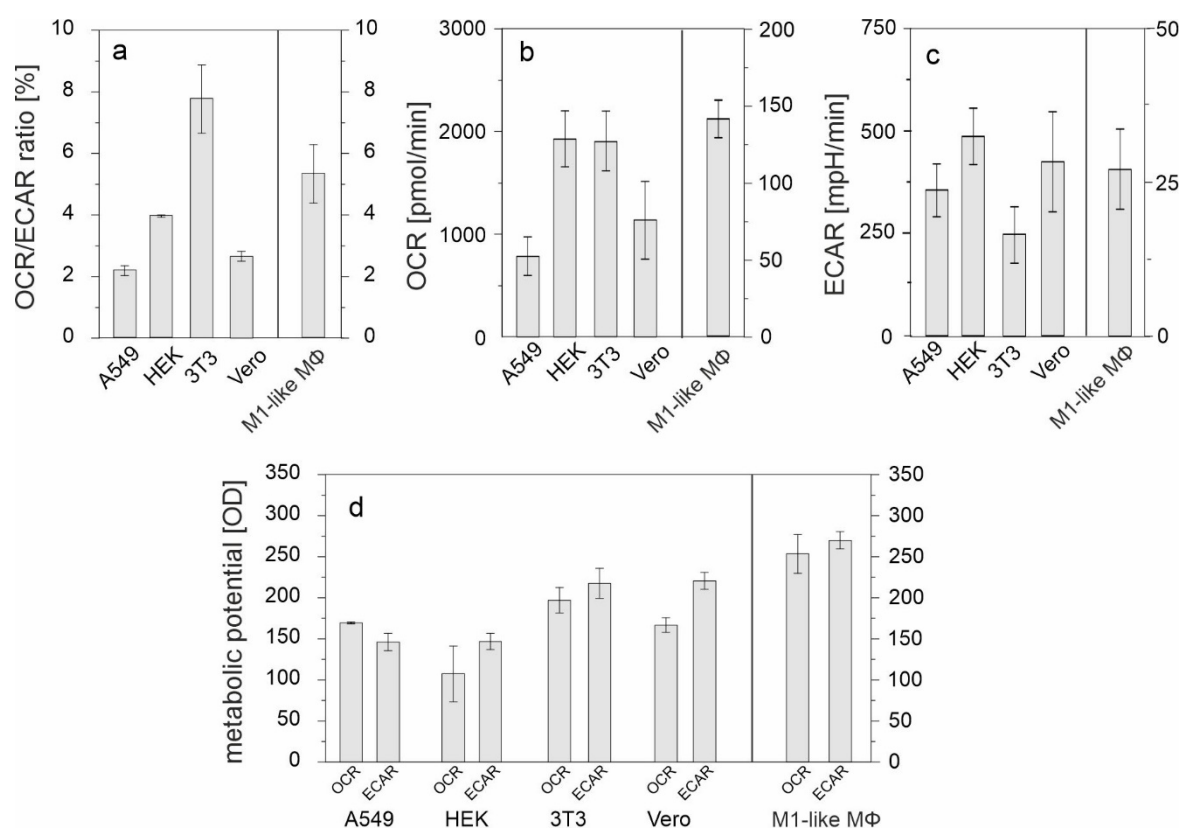

**Figure S1.** Extracellular flux analysis of metabolic properties of all given cell types after 16 h incubation. In (a) OCR/ECAR ratio, (b) OCR and (c) ECAR are presented after flux analysis of A549, HEK, 3T3, Vero and M1-like MΦ without microcarrier application. In (d) metabolic potential regarding increase in stressed OCR and ECAR over basal OCR and ECAR, respectively, is shown. A549, HEK, 3T3 and Vero measurements are normalized on protein concentration (OD) using a Bradford assay, while M1-like MΦ were used as previously defined based on equal cell numbers during plating.

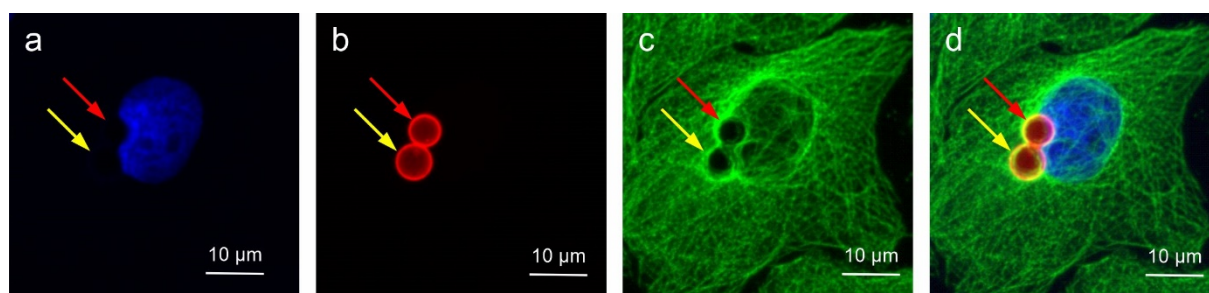

**Figure S2.** Localization of SLB microcarriers in Vero cells. SLB microcarriers (red, (b)) were mostly localized in perinuclear regions, where they were involved in nuclear deformations (blue, (a)). Additionally, they were associated with microtubule-dense areas (green, (c)), which appear to represent the microtubule organizing center (MTOC, dense green structure with high intensity). Overlay is shown in (d). Image size: 50µm × 50µm.

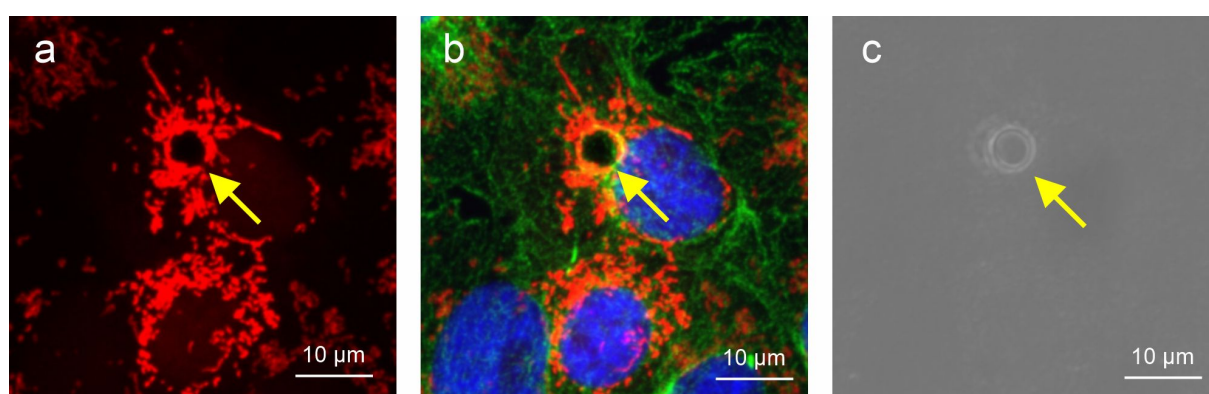

**Figure S3.** Analysis of SLB microcarriers in Vero cells after incubation with SLB microcarriers for 6 h. Mitochondria are shown in red (a) and in the overlay (b), which also includes microtubule filaments (green) and nuclei (blue). SLB microcarriers are shown in the transmission image, (c) SLB microcarriers appeared in perinuclear localization and in association with strong nuclear deformations and mitochondria. Image size: 50µm × 50µm.

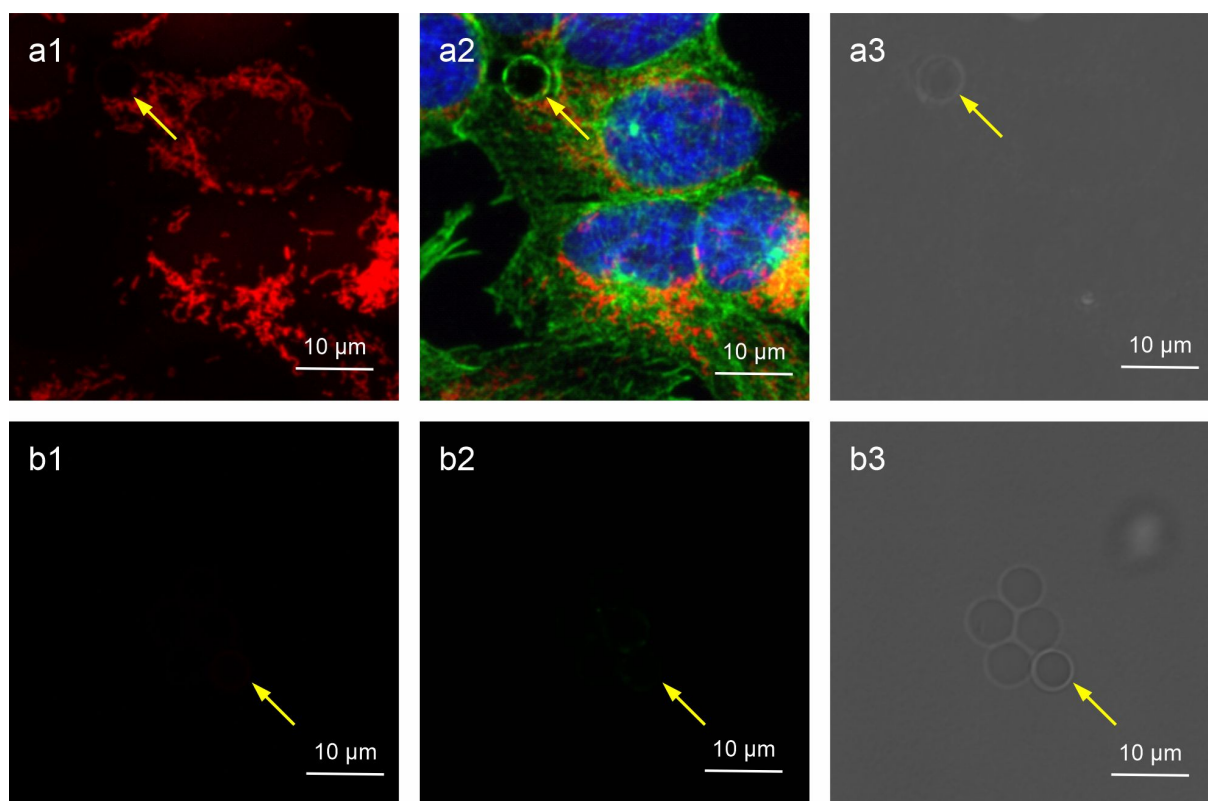

**Figure S4.** Intracellular staining of mitochondria with MitoTracker Red dye in Vero cells after incubation with SLB microcarrier for 6 h. The application of MitoTracker dyes as positively charged rosamine derivatives raises the possibility of co-staining of the lipid membrane or polymer network of the microcarriers. To address this possibility, unlabelled SLB microcarriers were applied to Vero cells for 6 h, followed by incubation with MitoTracker Red (red: mitochondria), DNA counterstain (blue: nucleus) and immunofluorescence analysis with anti-tubulin antibodies (green: microtubule) with overlays in (a2, b2); transmission: SLB microcarriers (a3, b3)). Intracellular microcarriers (**a**) and extracellular microcarriers (**b**) were analyzed. Within a representative cell (**a**), unlabelled SLB microcarriers appear with a green shell. No MitoTracker Red labelling of microcarriers was observed. In extracellular space (**b**), unlabelled SLB microcarrier were not stained by MitoTracker Red or anti- $\alpha$ -tubulin antibodies. Thus, intracellular green shell of SLB microcarriers was caused solely by its association with stained microtubule filaments. Image size: 50 $\mu$ m  $\times$  50 $\mu$ m. .
